# Supplementary material for: A highly lipophilic terpyridine ligand as an efficient fluorescent probe for the selective detection of zinc( ii ) ions under biological conditions
Source: Royal Society of Chemistry journal article supplement (doi:10.1039/d4ay01818d), 2024-11-13
Supplement: d4ay01818d1.pdf [file d4ay01818d1.pdf]

# Highly Lipophilic Terpyridine Ligand as an Efficient Fluorescent Probe for the Selective Detection of Zinc(II) Ions Under Biological Conditions

Rakesh R Panicker<sup>a</sup>, Suman Joseph<sup>a</sup>, S. Dharani<sup>a</sup>, Martin Luther John<sup>a</sup>, Amal T. Kuriappan<sup>a</sup>, Josh T. Abraham<sup>a</sup>, S. Abdul Majeed<sup>b</sup>, P.B. Pavankumar<sup>a</sup>, Ashok Kumar S.K<sup>a</sup>, Akella Sivaramakrishna<sup>a\*</sup>

<sup>a</sup>Department of Chemistry, School of Advanced Sciences, Vellore Institute of Technology, Vellore-632014, Tamil Nadu, India.

<sup>b</sup>Aquatic Animal Health Laboratory, PG & Research Department of Zoology, C. Abdul Hakeem College (Autonomous), Melvisharam-632509, Tamil Nadu, India.

\*E-mail: [asrkrishna@vit.ac.in](mailto:asrkrishna@vit.ac.in)

## List of Figures

| Contents                                                                         | Page No. |
|----------------------------------------------------------------------------------|----------|
| <b>Figure S1.</b> <sup>1</sup> H NMR Spectrum of compound <b>2</b>               | <b>3</b> |
| <b>Figure S2.</b> <sup>13</sup> C NMR Spectrum of compound <b>2</b>              | <b>3</b> |
| <b>Figure S3.</b> <sup>1</sup> H NMR Spectrum of compound <b>tpy-OH</b>          | <b>4</b> |
| <b>Figure S4.</b> <sup>13</sup> C NMR Spectrum of compound <b>tpy-OH</b>         | <b>4</b> |
| <b>Figure S5.</b> <sup>1</sup> H NMR Spectrum of compound <b>L<sub>1</sub></b>   | <b>5</b> |
| <b>Figure S6.</b> <sup>13</sup> C NMR Spectrum of compound <b>L<sub>1</sub></b>  | <b>5</b> |
| <b>Figure S7.</b> IR Spectrum of compound <b>L<sub>1</sub></b>                   | <b>6</b> |
| <b>Figure S8.</b> ESI-Mass Spectrum of compound <b>L<sub>1</sub></b>             | <b>6</b> |
| <b>Figure S9.</b> <sup>1</sup> H NMR Spectrum of compound <b>L<sub>2</sub></b>   | <b>7</b> |
| <b>Figure S10.</b> <sup>13</sup> C NMR Spectrum of compound <b>L<sub>2</sub></b> | <b>7</b> |
| <b>Figure S11.</b> IR Spectrum of compound <b>L<sub>2</sub></b>                  | <b>8</b> |
| <b>Figure S12.</b> ESI-Mass Spectrum of compound <b>L<sub>2</sub></b>            | <b>8</b> |
| <b>Figure S13.</b> <sup>1</sup> H NMR Spectrum of compound <b>L<sub>3</sub></b>  | <b>9</b> |

|                                                                                     |           |
|-------------------------------------------------------------------------------------|-----------|
| <b>Fig. S14</b> $^{13}\text{C}$ NMR spectrum of compound <b>L<sub>3</sub></b>       | <b>9</b>  |
| <b>Figure S15.</b> IR Spectrum of compound <b>L<sub>3</sub></b>                     | <b>10</b> |
| <b>Figure S16.</b> ESI-Mass Spectrum of compound <b>L<sub>3</sub></b>               | <b>10</b> |
| <b>Figure S17.</b> $^1\text{H}$ NMR Spectrum of compound <b>L<sub>2</sub>-Zn</b>    | <b>11</b> |
| <b>Figure S18.</b> $^{13}\text{C}$ NMR Spectrum of compound <b>L<sub>2</sub>-Zn</b> | <b>12</b> |
| <b>Figure S19.</b> IR Spectrum of compound <b>L<sub>2</sub>-Zn</b>                  | <b>12</b> |
| <b>Figure S20.</b> ESI-Mass Spectrum of compound <b>L<sub>2</sub>-Zn</b>            | <b>13</b> |

### List of Tables

| <b>Contents</b>                                                                                                                                              | <b>Page No.</b> |
|--------------------------------------------------------------------------------------------------------------------------------------------------------------|-----------------|
| <b>Table S1.</b> Comparison of <b>L<sub>2</sub></b> with previously reported fluorescent probes for the selective detection of $\text{Zn}^{2+}$ ions.        | <b>15</b>       |
| <b>Table S2.</b> Determination of $\text{Zn}^{2+}$ in ambient water samples (samples are analyzed in triplicate).                                            | <b>16</b>       |
| <b>Table S3.</b> Theoretically, predicted excited state electronic properties of <b>L<sub>2</sub></b> and <b>L<sub>2</sub>-Zn<sup>2+</sup></b> using TD-DFT. | <b>16</b>       |

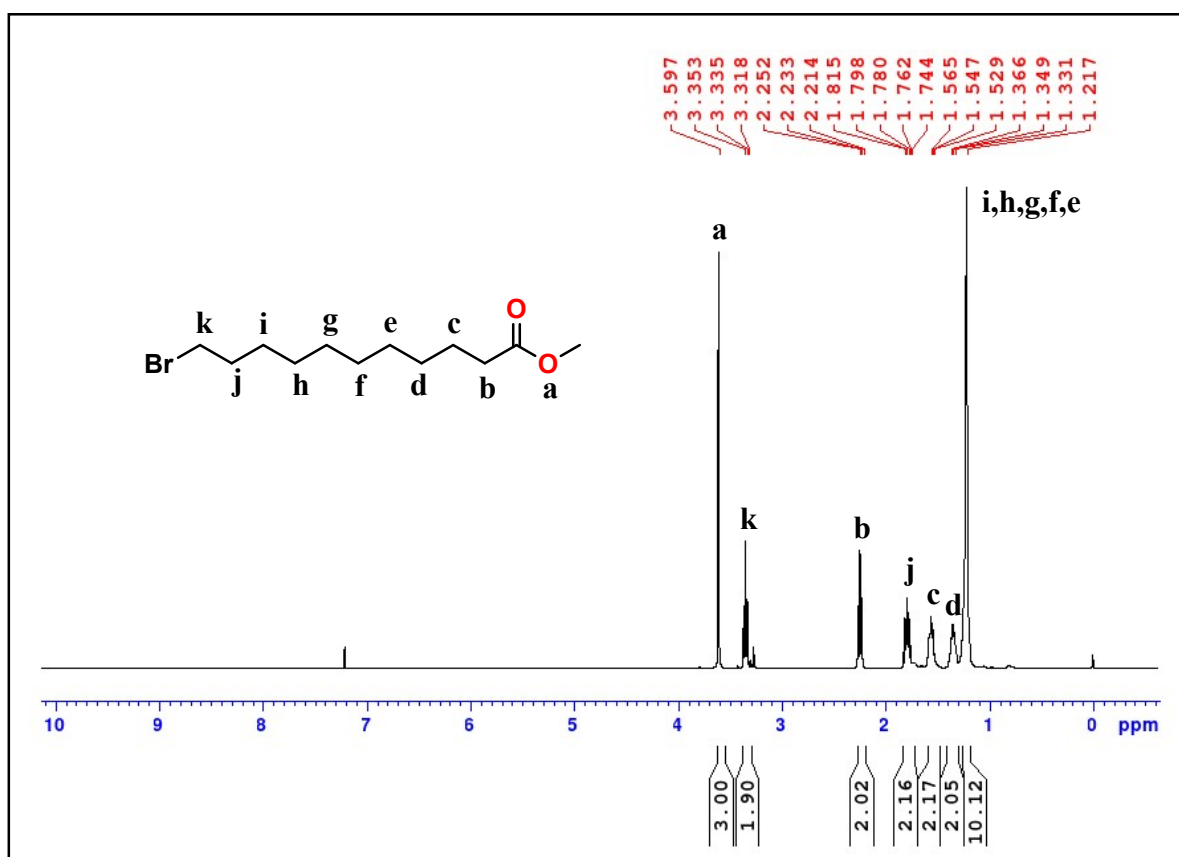

Fig. S1 <sup>1</sup>H NMR Spectrum of compound of 2

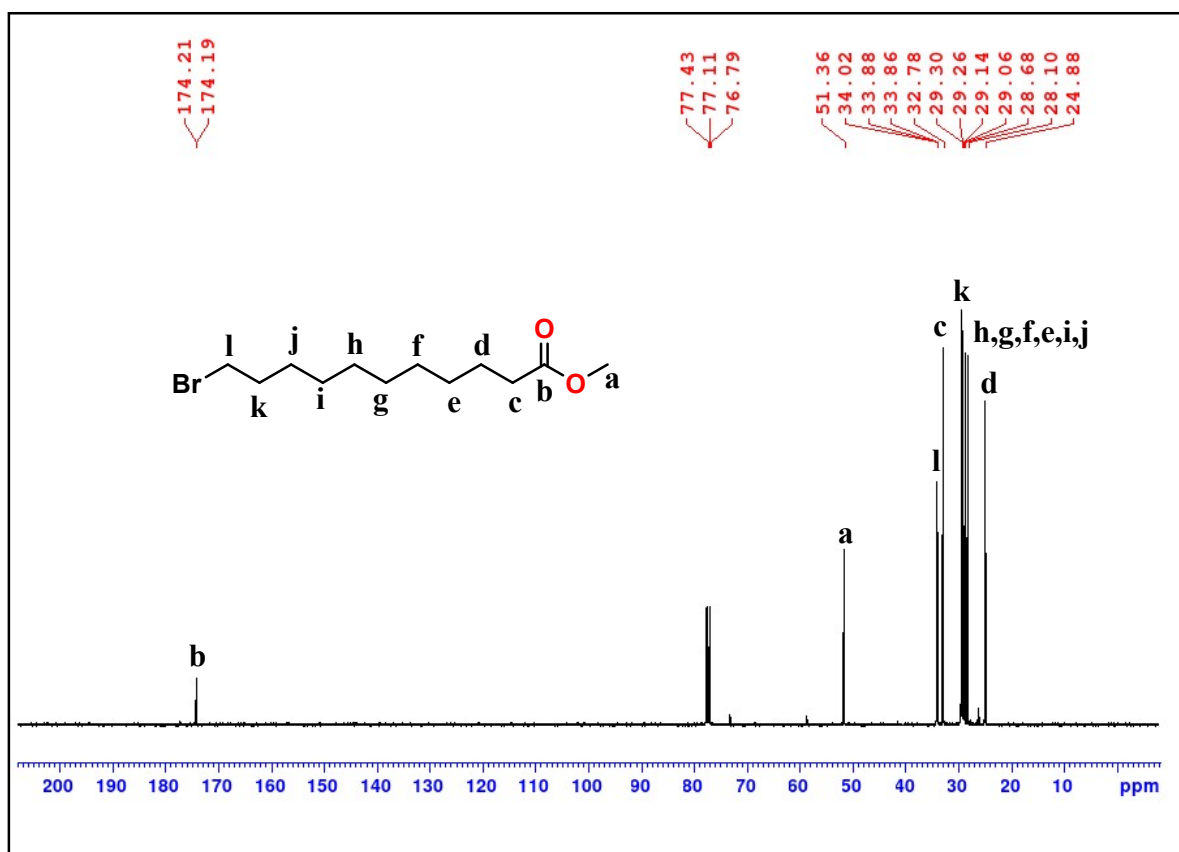

**Fig. S2**  $^{13}\text{C}$  NMR spectrum of compound **2**

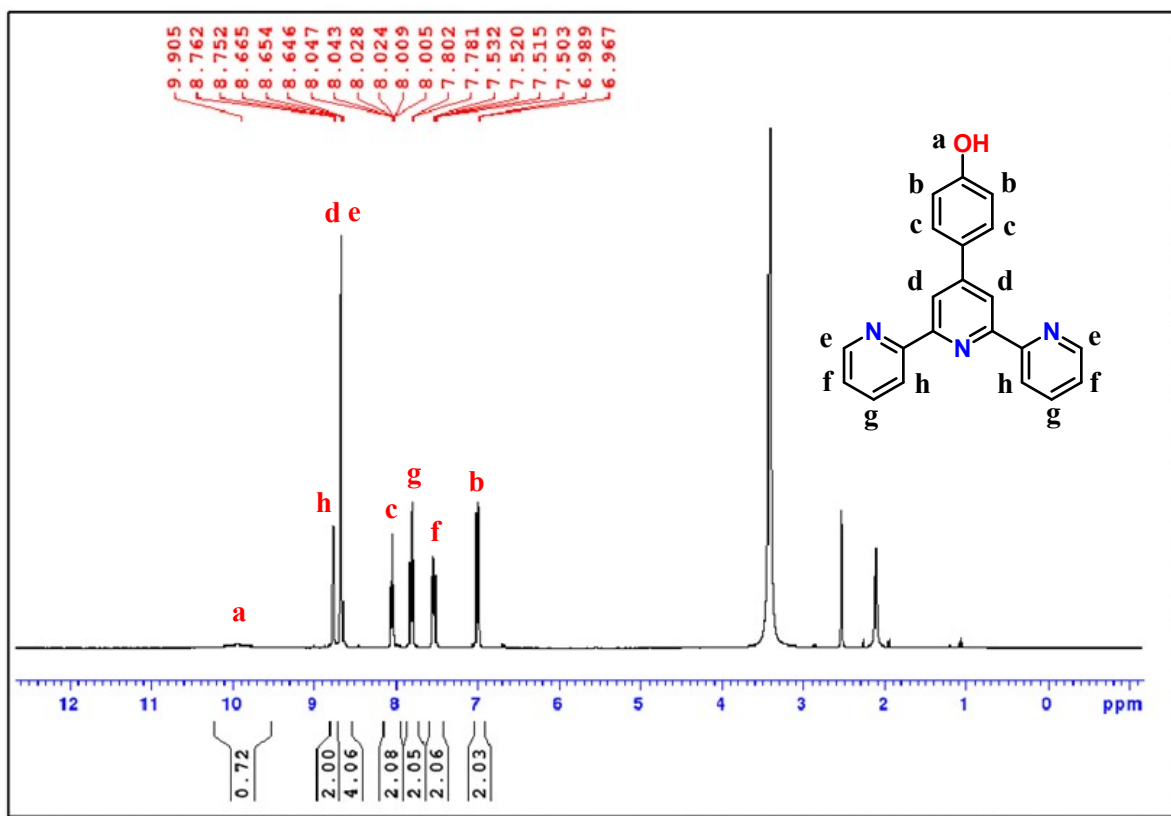

**Fig. S3**  $^1\text{H}$  NMR spectrum of compound **tpy-OH**

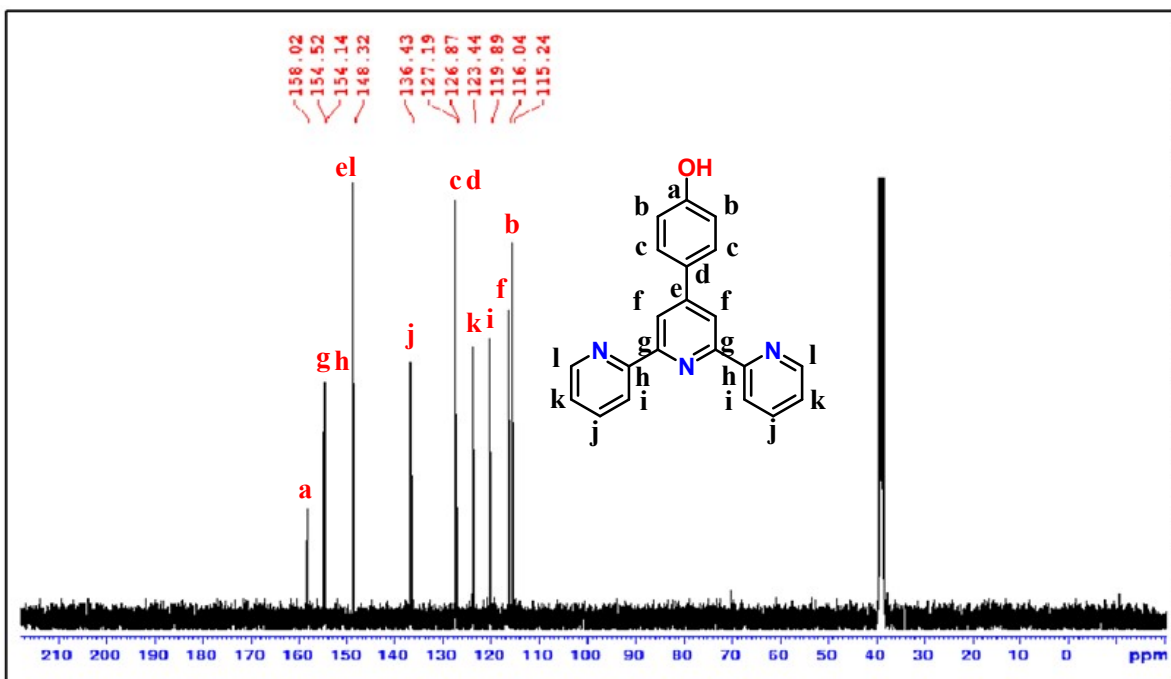

**Fig. S4**  $^{13}\text{C}$  NMR spectrum spectrum of compound **tpy-OH**

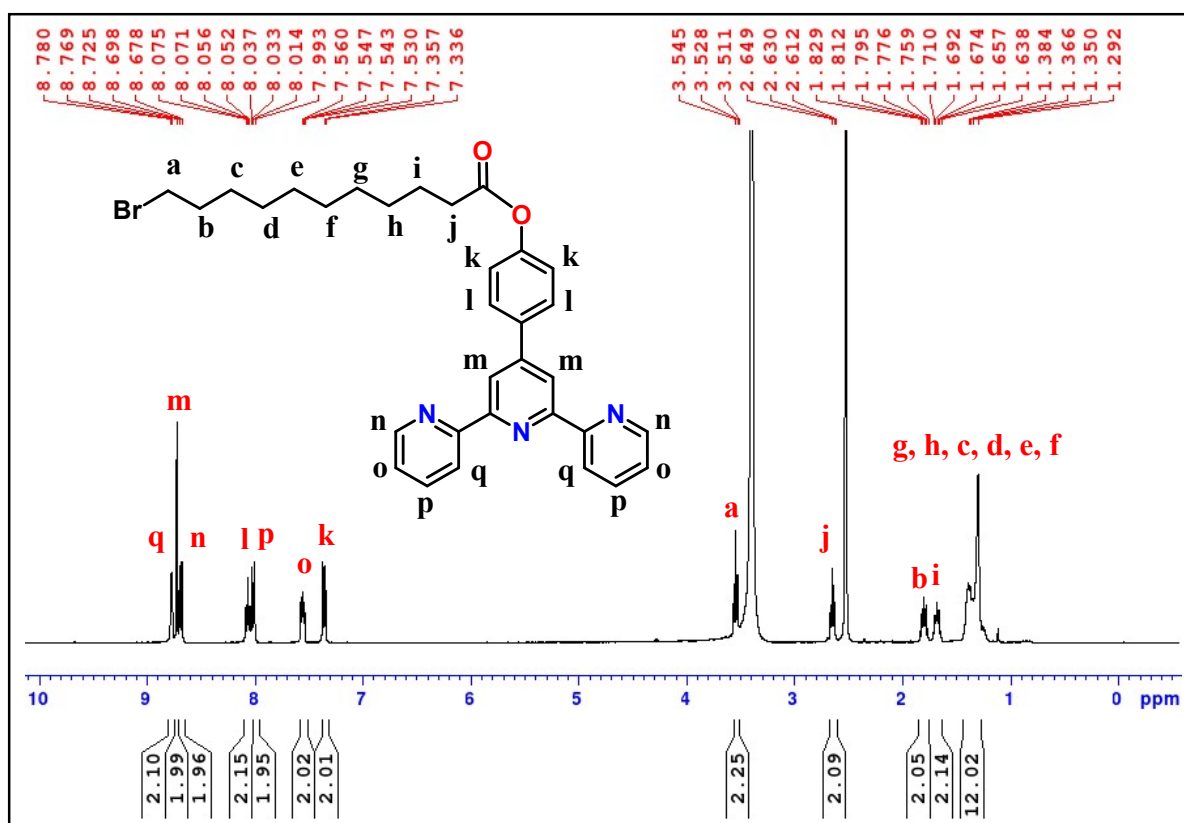

Fig. S5 <sup>1</sup>H NMR spectrum of compound L1

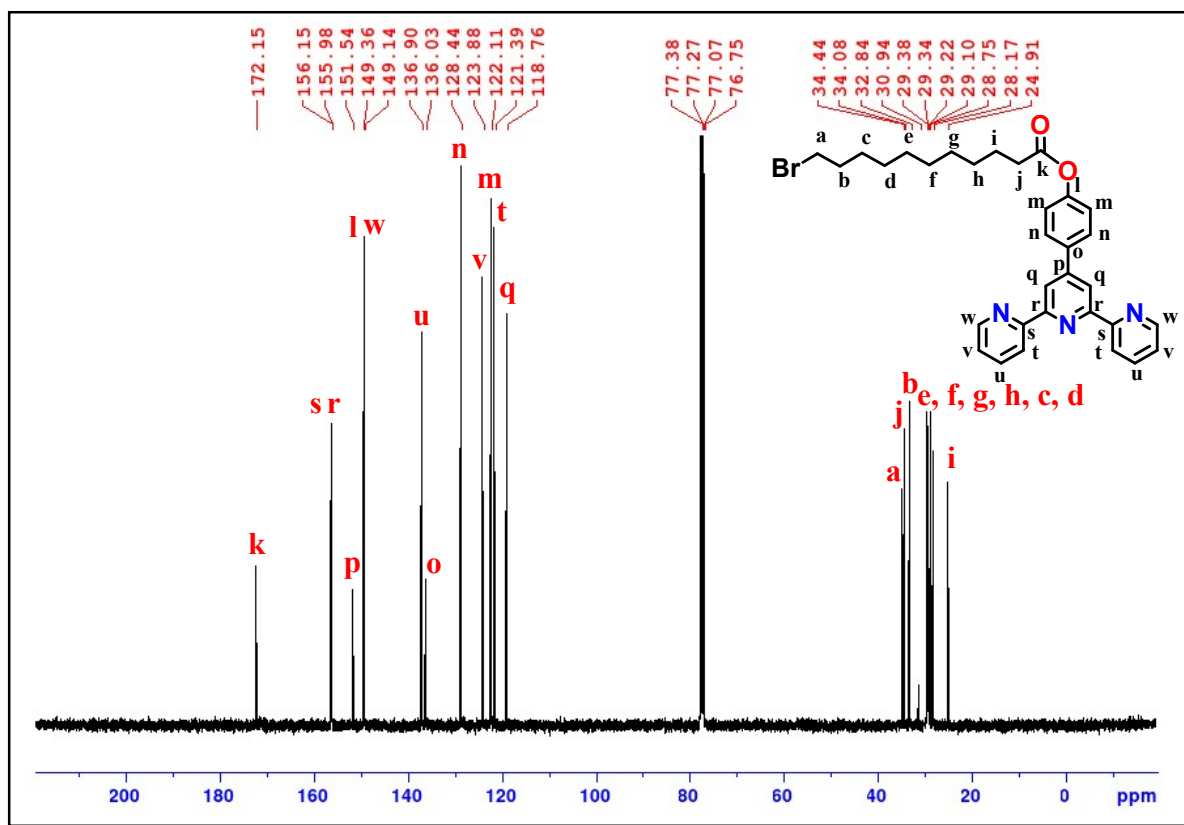

**Fig. S6**  $^{13}\text{C}$  NMR spectrum spectrum of compound **L1**

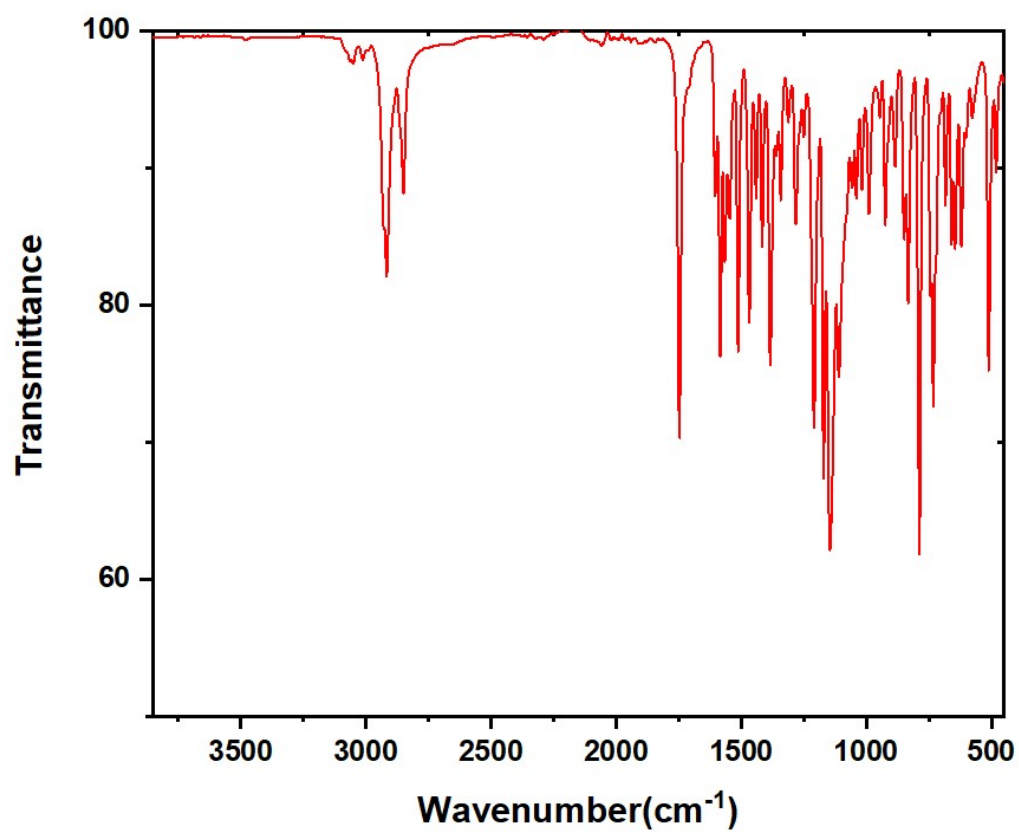

**Fig. S7** FT-IR spectrum of compound **L1**

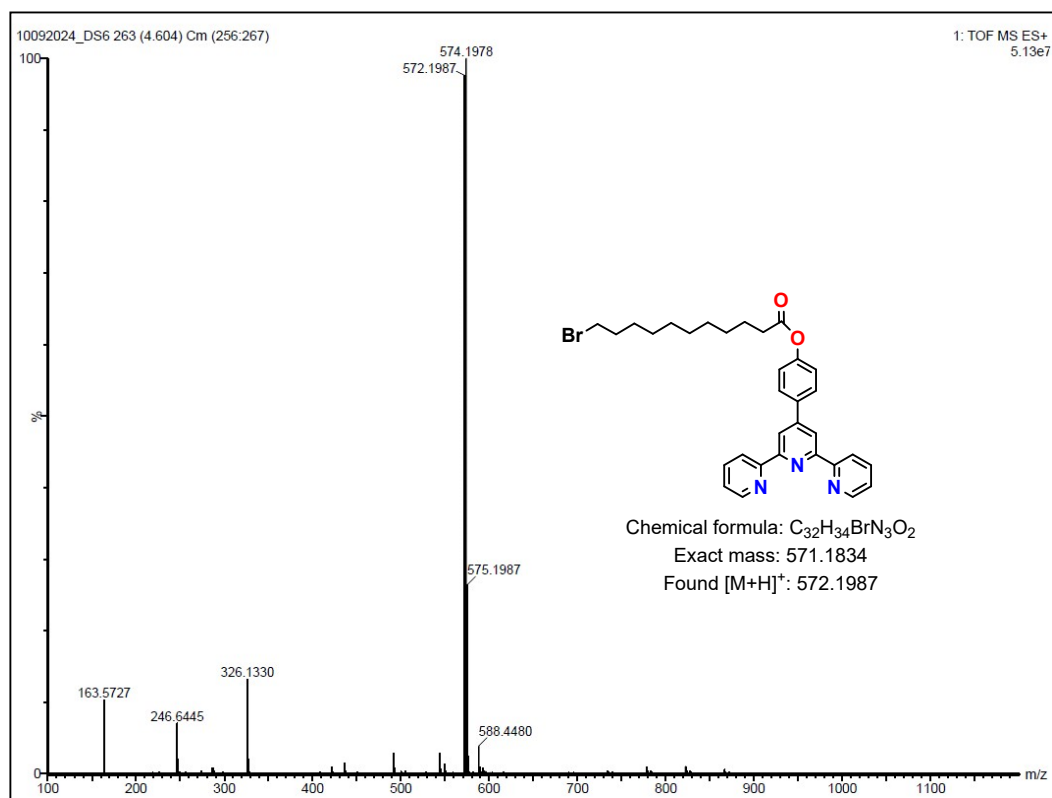

**Fig. S8** ESI-MS Spectrum of compound **L1**

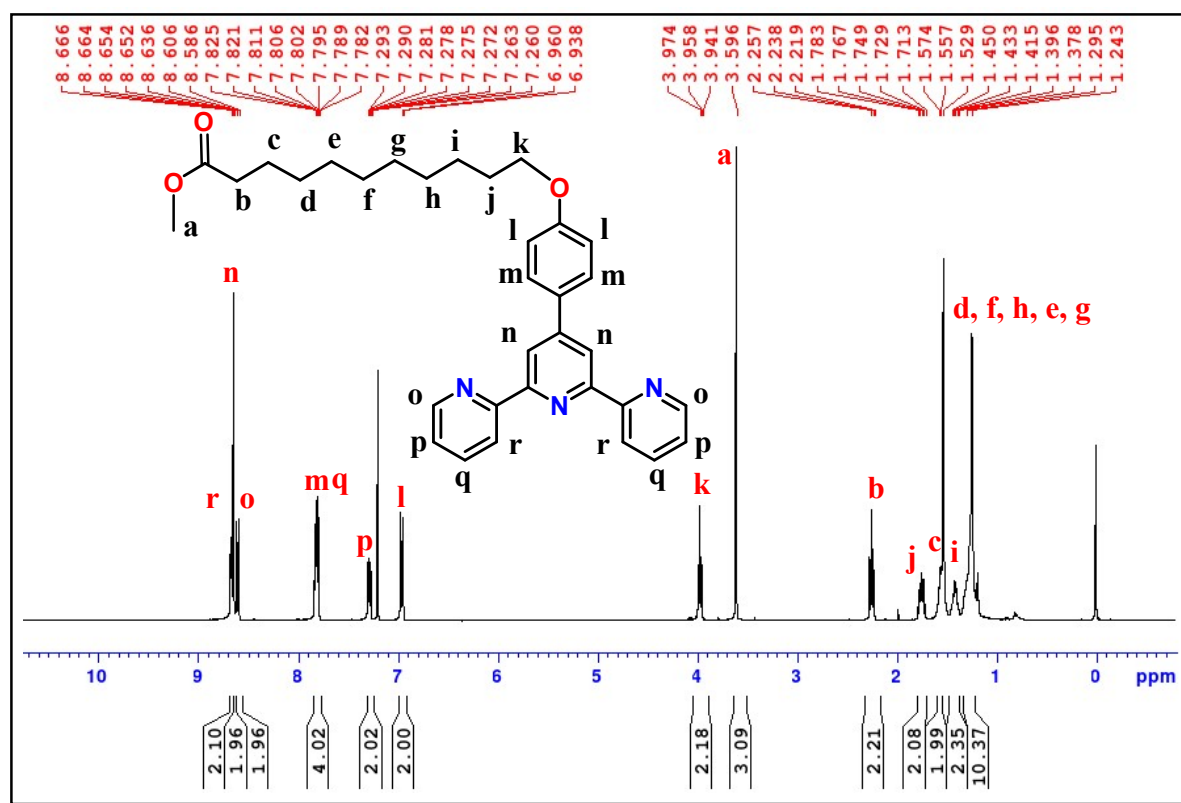

**Fig. S9** <sup>1</sup>H NMR spectrum of compound **L2**

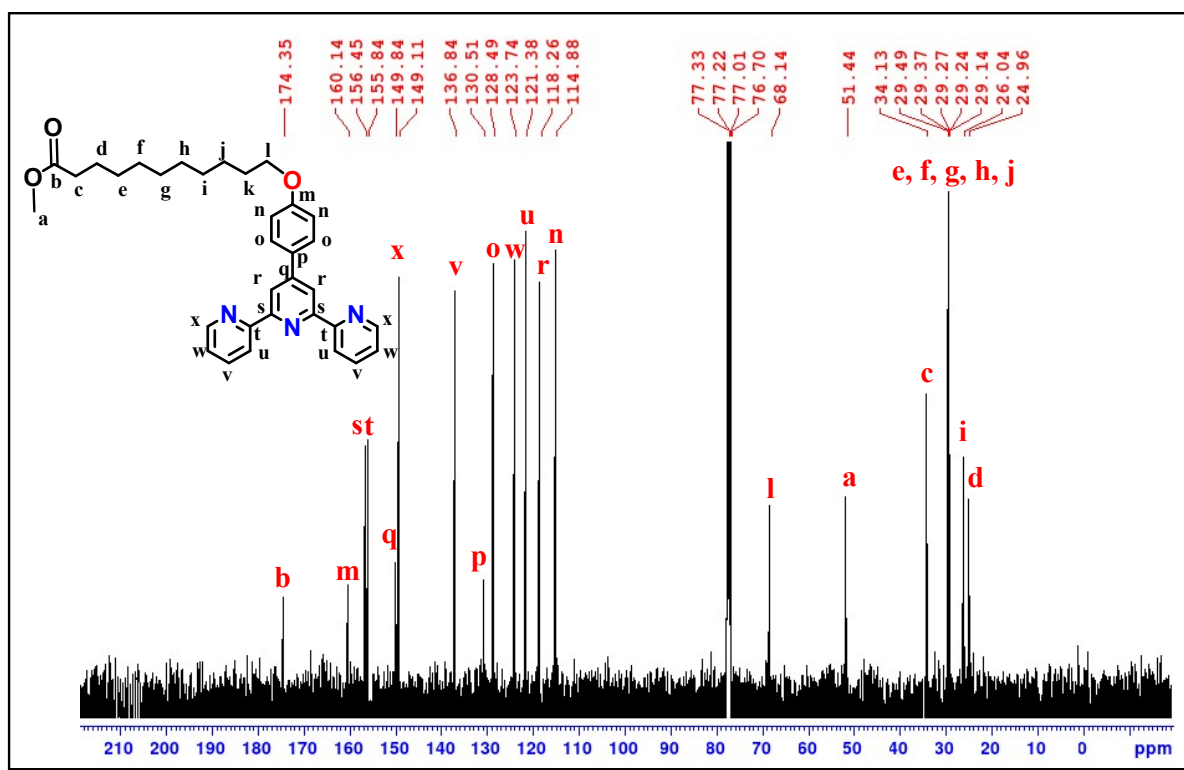

**Fig. S10**  $^{13}\text{C}$  NMR spectrum of compound L2

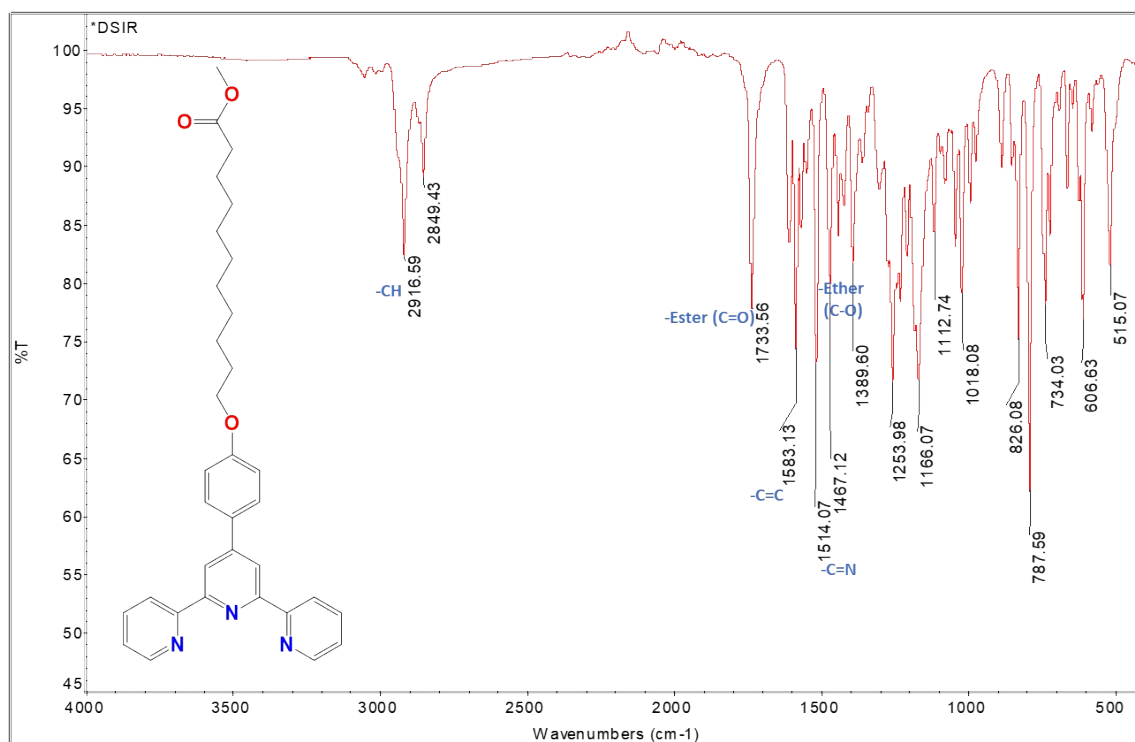

**Fig. S11** FT-IR spectrum of compound L2



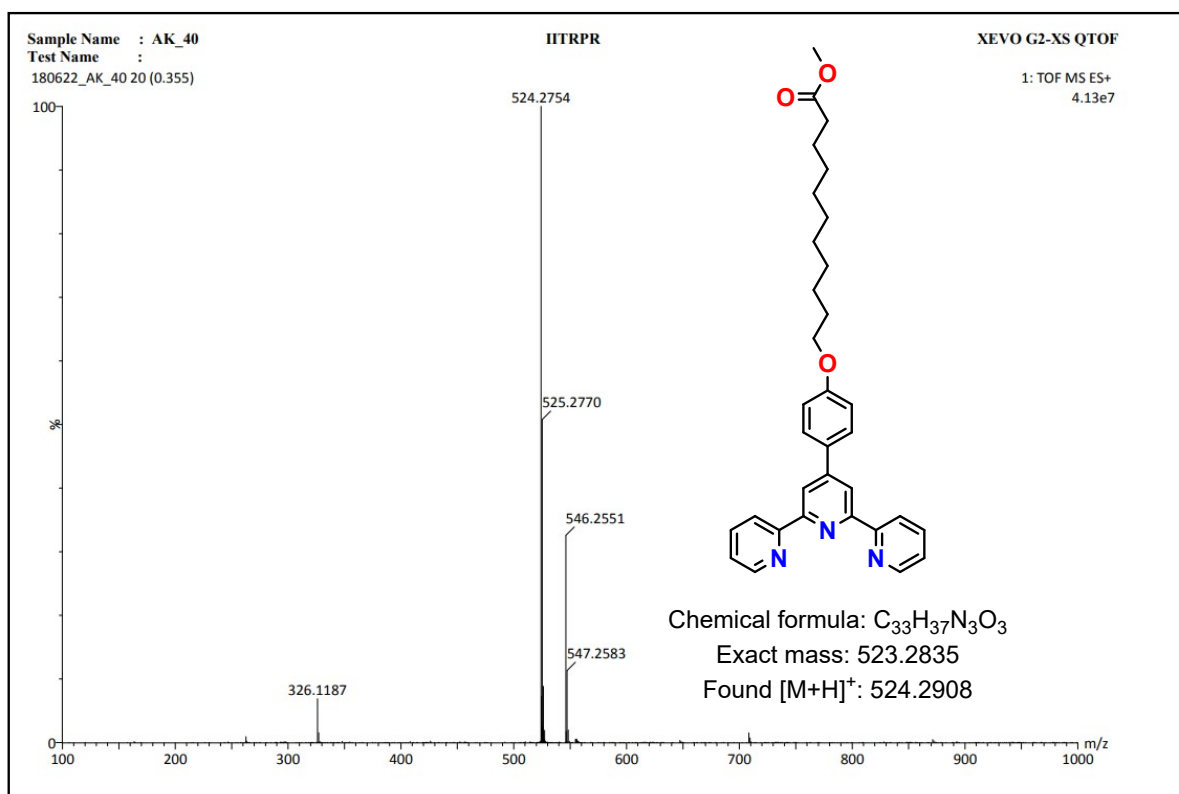

Fig. S12 ESI-MS Spectrum of compound L2

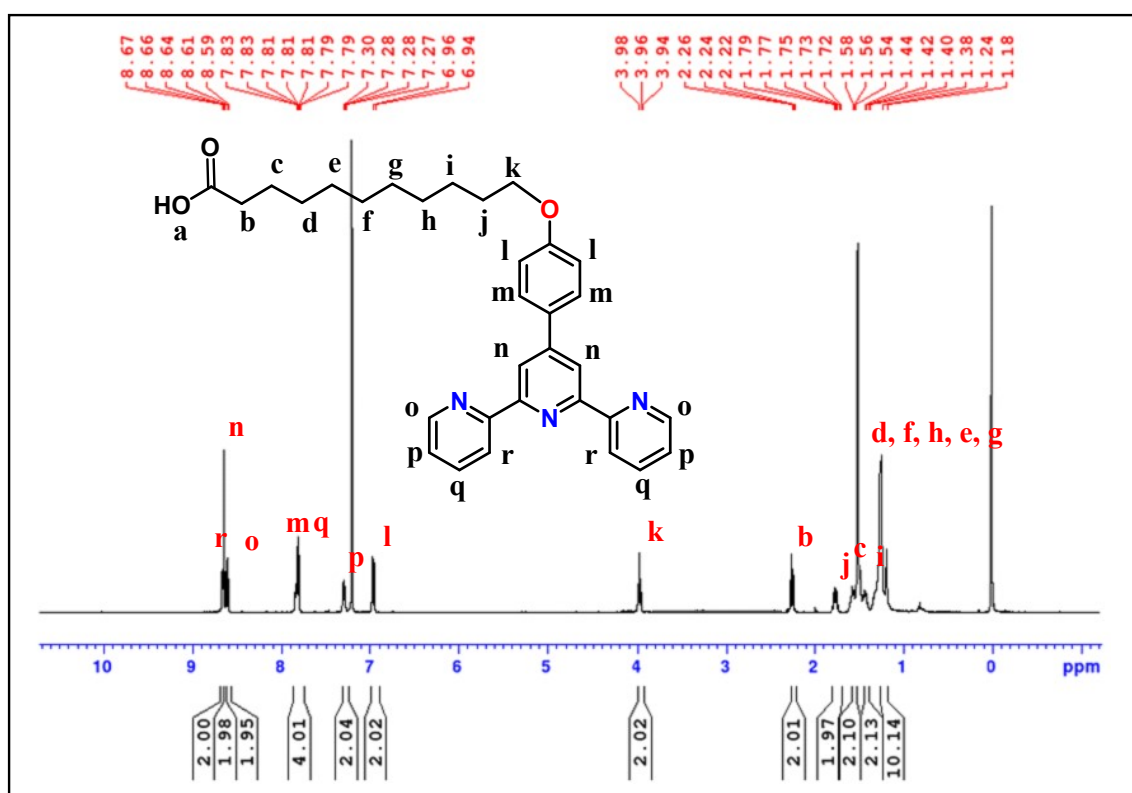

Fig. S13 <sup>1</sup>H NMR spectrum of compound L3

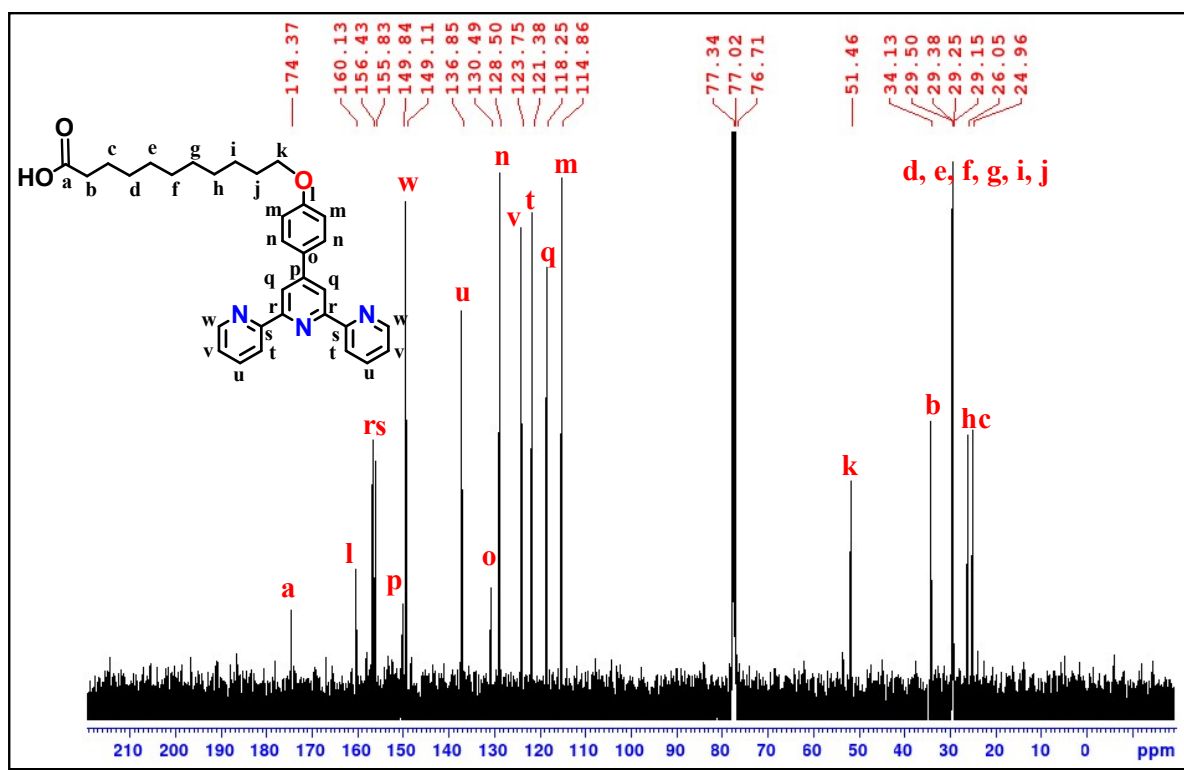

Fig. S14 <sup>13</sup>C NMR spectrum of compound L3

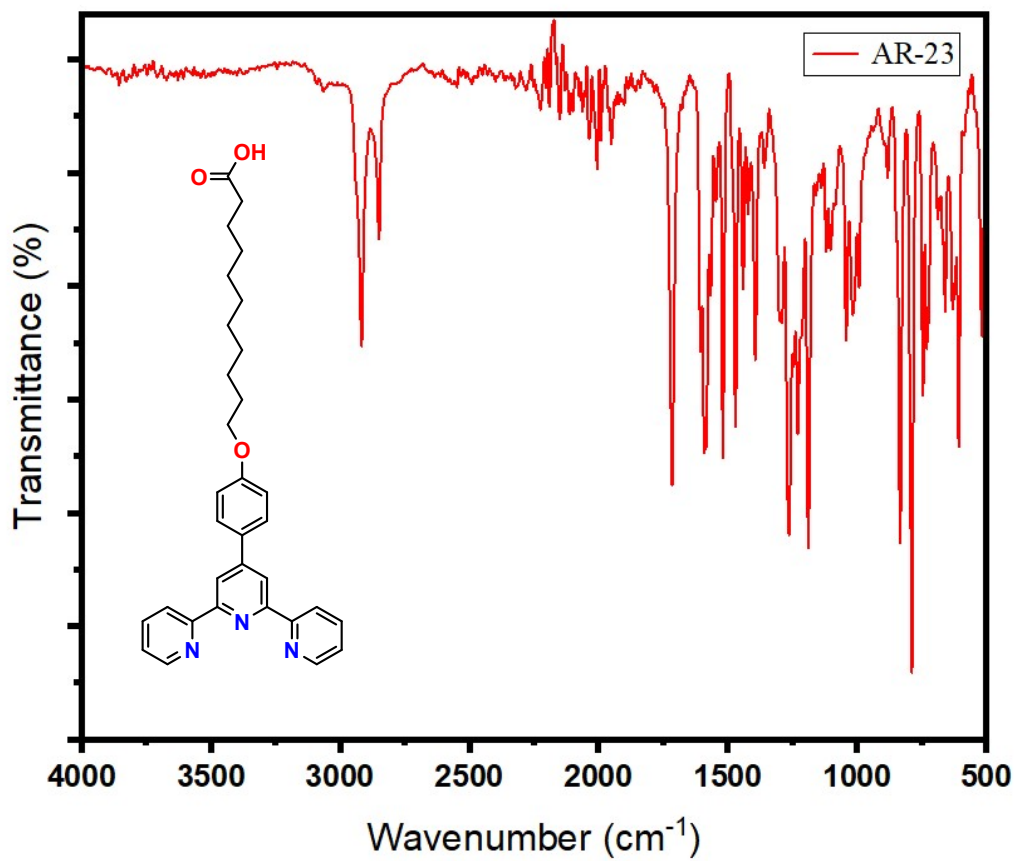

**Fig. S15** IR Spectrum of compound **L3**

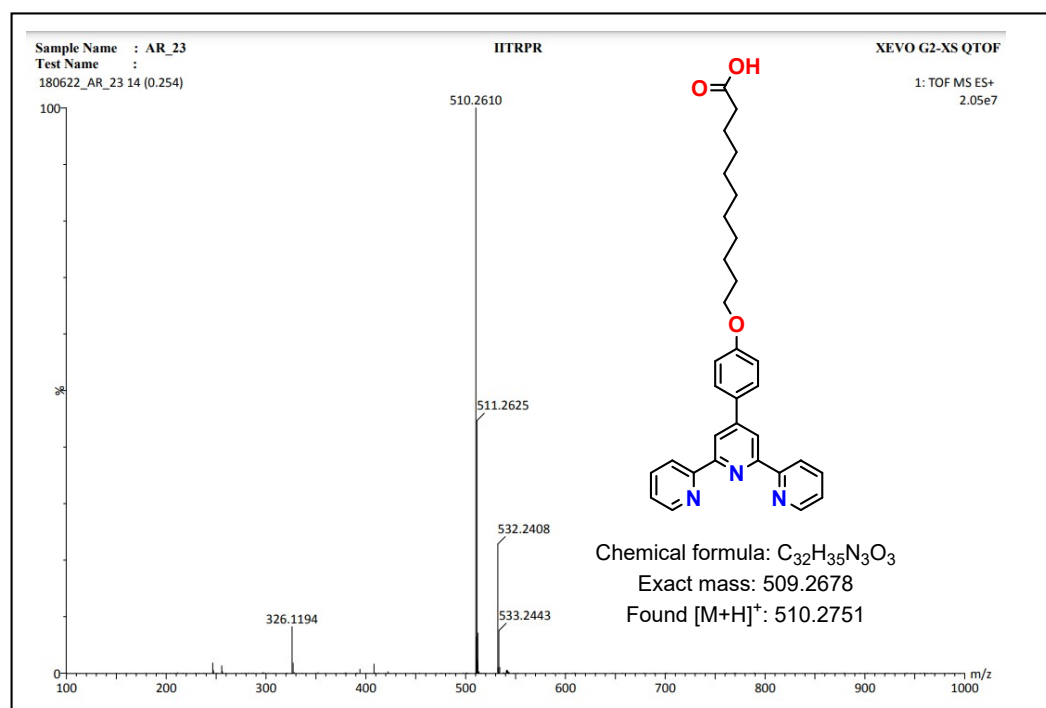

**Fig. S16** ESI-MS Spectrum of compound **L3**

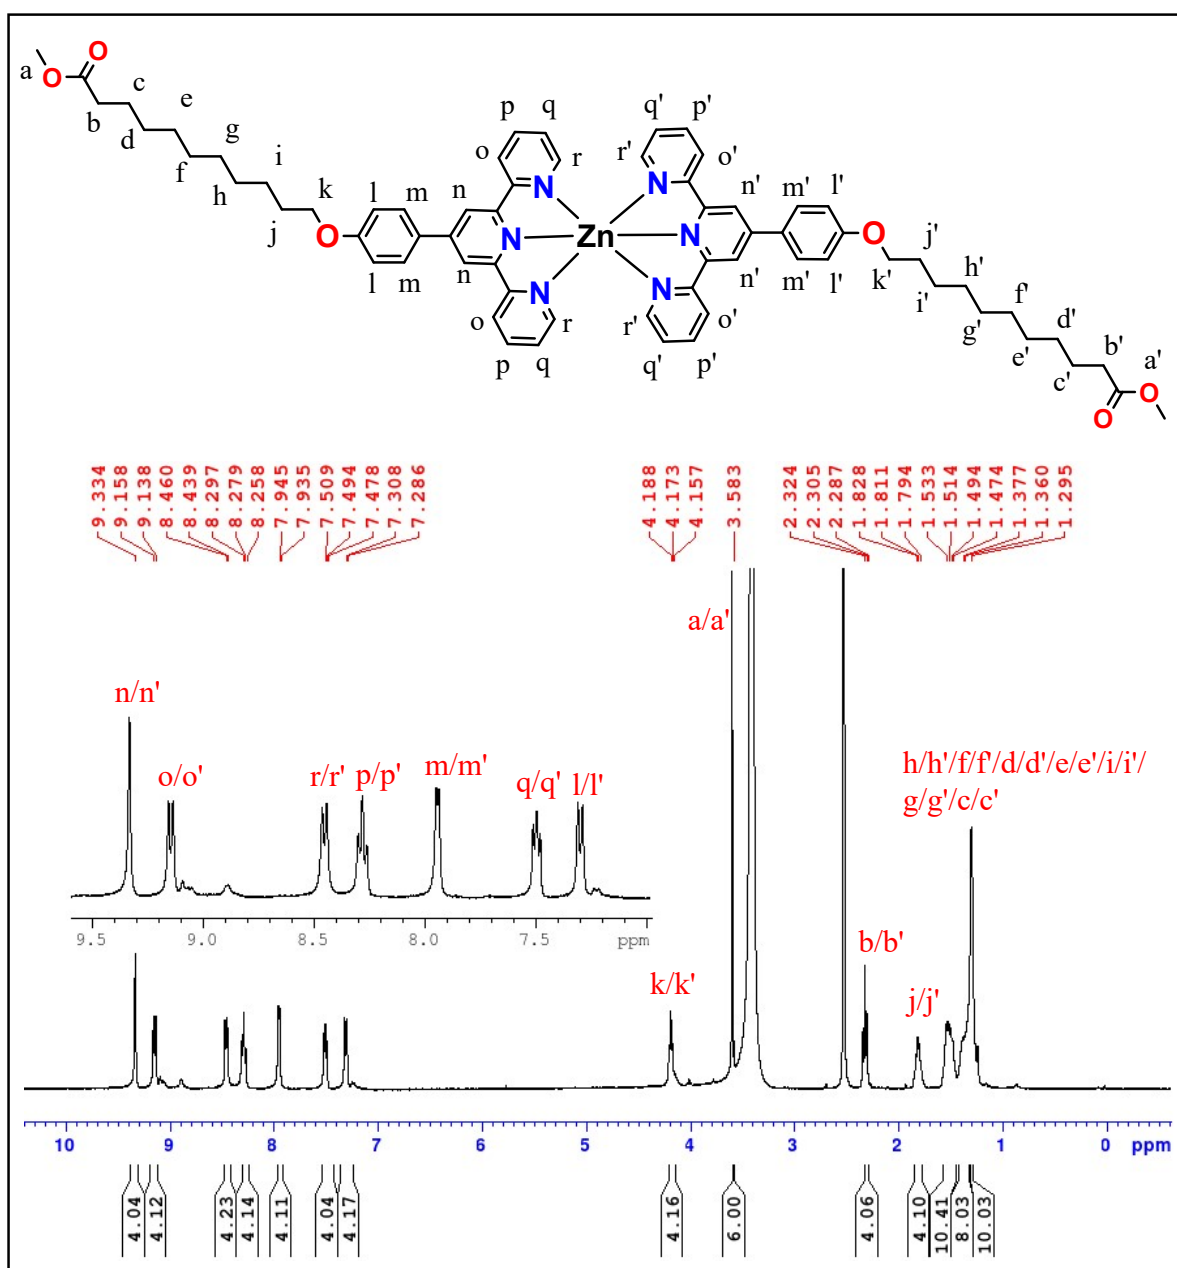

**Fig. S17** <sup>1</sup>H NMR spectrum of Zn(II) complex **L<sub>2</sub>-Zn**

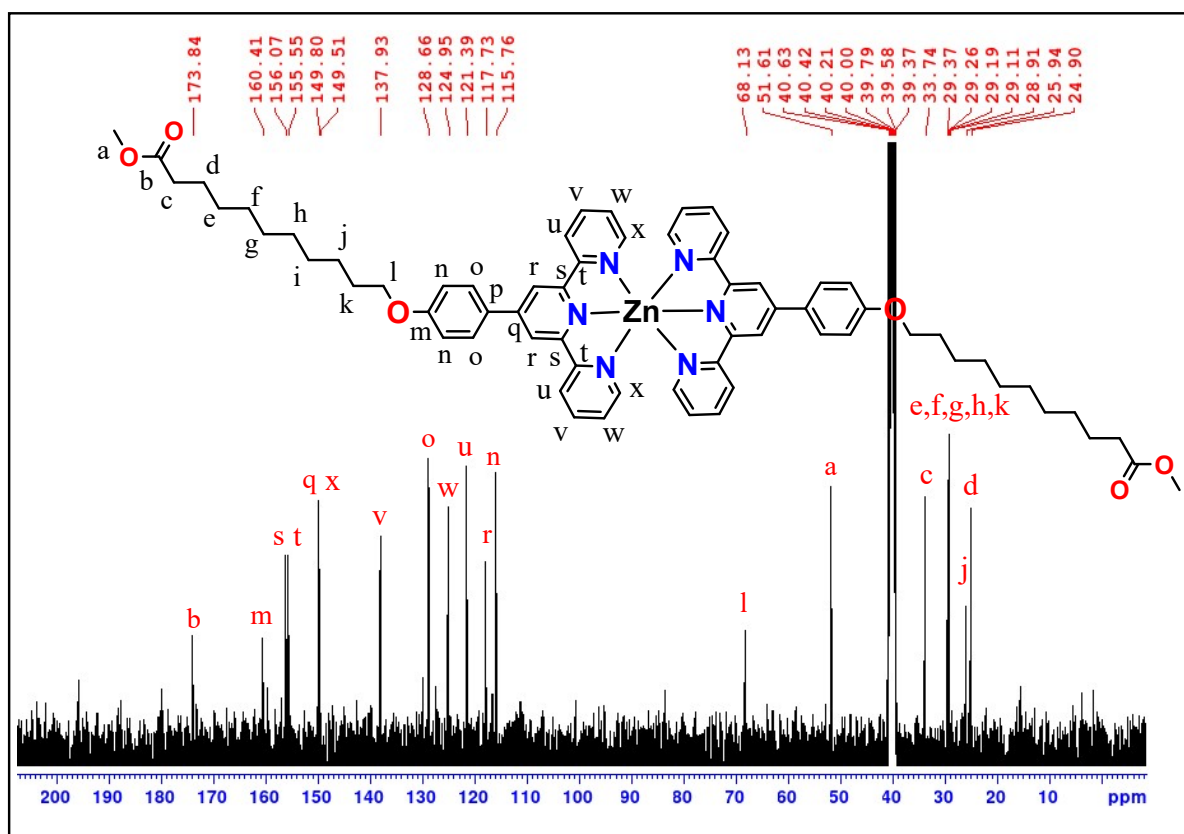

**Fig. S18**  $^{13}\text{C}$  NMR spectrum of Zn(II) complex  $L_2$ -Zn

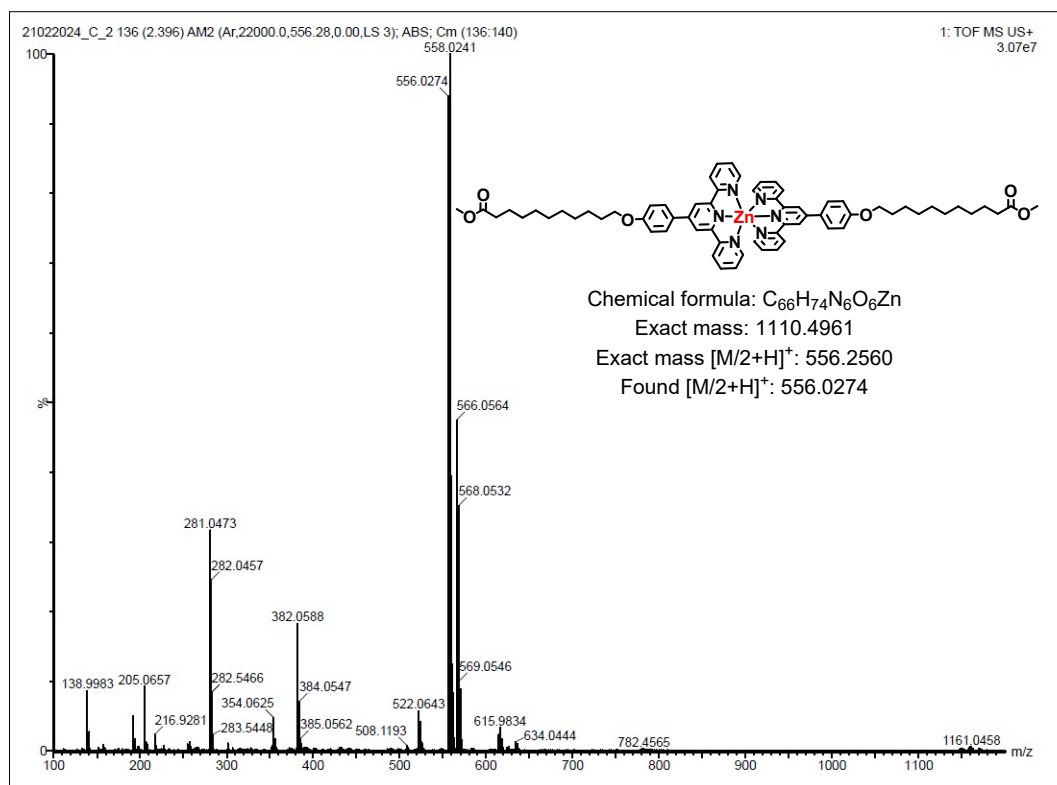

**Fig. S19** ESI-MS Spectrum of complex  $L_2$ -Zn

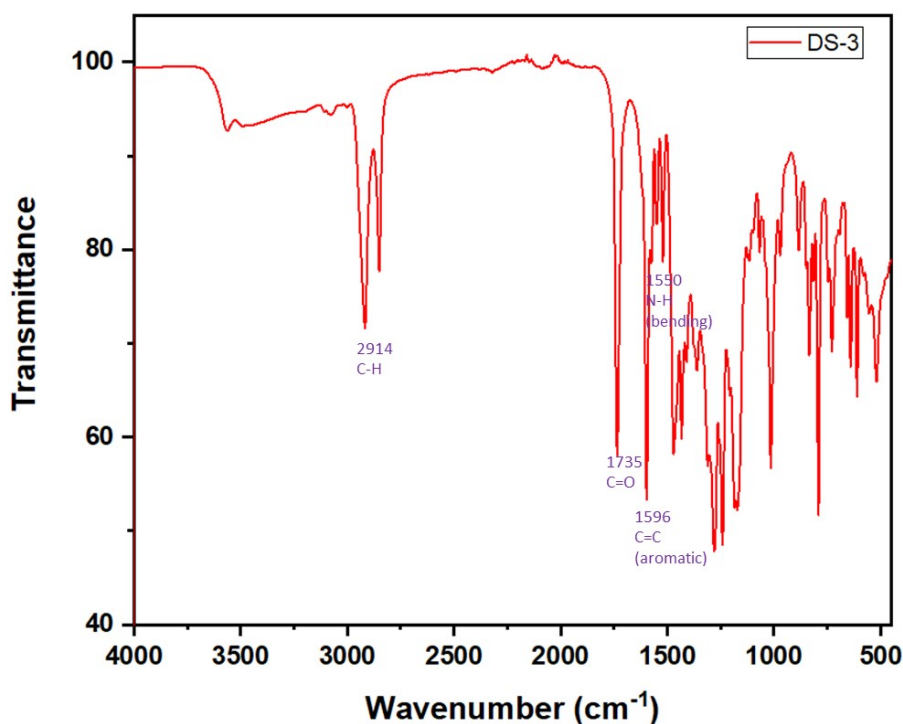

**Fig. S20** IR Spectrum of complex **L<sub>2</sub>-Zn**

### Interpretation of the spectroscopic data of the ligands and **tpy-Zn(II)** complex (**L<sub>2</sub>-Zn**)

In ligand **L<sub>2</sub>**, protons corresponding to the -OCH<sub>3</sub> group conformed with the singlet signal at  $\delta$  3.59 ppm. The 2 protons of the middle pyridine ring were seen as an intense singlet at  $\delta$  8.63 ppm. Similarly, protons attributed to the ether part (O-CH<sub>2</sub>) resonated as a triplet at 3.95 ppm. Likewise, every aromatic proton of compound **L<sub>3</sub>** resonated between 6.94 ppm and 8.67 ppm. The 2 protons of the middle pyridine ring were exhibited as a sharp singlet at  $\delta$  8.64 ppm and protons attributed to the O-CH<sub>2</sub> group resonated as a triplet at 3.96 ppm.

In the ligand **L<sub>2</sub>**, the C=O carbon resonated at  $\delta$  174.35 ppm. The signals at 68.14 ppm and 51.44 ppm were attributed to the O-CH<sub>2</sub> and O-CH<sub>3</sub> carbons, respectively. Similarly, In **L<sub>3</sub>**, the C=O was resonated at 174.37 ppm and all other aromatic and aliphatic carbons were resonated in the range of 114.86-160.13 ppm and 24.96-51-46 ppm, accordingly.

The spectral conformation of the synthesized tpy molecules **L<sub>1</sub>-L<sub>3</sub>** was verified with the spectral data from ESI-MS. In the mass spectrum of ligand **L<sub>2</sub>**, the molecular ion peak at  $m/z$  524.29 [**M** (523.29) +H]<sup>+</sup> and the fragment signal at 546.25 [**M**+Na]<sup>+</sup> were observed. The signal appeared at an  $m/z$  326.11 [**M**+H]<sup>+</sup> corresponds to the tpy precursor molecule (**tpy-OH**). The

signal with  $m/z$  510.27  $[M (509.26) + H]^+$  confirmed the presence of **L<sub>3</sub>** and showed a fragment peak position of  $[M+Na]^+$  at  $m/z$  532.24.

As seen in Fig. S17–S20 (ESI), the purity of the Zn(II) complex associated with the ligand **L<sub>2</sub>** was investigated by  $^1H$  NMR and  $^{13}C$  NMR in DMSO- $d_6$  at room temperature, IR, Elemental analysis and ESI-MS analysis. In the  $^1H$  NMR spectrum of the complex **L<sub>2</sub>-Zn**, a multiplet with a chemical shift of  $\delta$  1.29-1.37 ppm represented the protons bonded to the strongly shielded aliphatic groups. Moreover, the 6 protons corresponding to the -OCH<sub>3</sub> groups conformed with the singlet signal at  $\delta$  3.58 ppm. The 4 protons of the middle pyridine ring were seen as an intense singlet at  $\delta$  9.33 which is shifted towards the de-shielded region in comparison to the associated  $^1H$  spectrum of the ligand. Similarly, the 4 protons attributed to the ether part (O-CH<sub>2</sub>) resonated as a triplet at 4.17 ppm and all other aromatic protons resonated between 7.28 ppm and 9.15 ppm. Similarly, in  $^{13}C$  NMR, the C=O carbon resonated at  $\delta$  173.84 ppm. The signals at 68.13 ppm and 51.61 ppm were attributed to the O-CH<sub>2</sub> and O-CH<sub>3</sub> carbons, accordingly. The spectral conformation of the synthesized complex (**L<sub>2</sub>:Zn<sup>2+</sup>**) were verified with the spectral data from ESI-MS. The exact molecular mass and  $[M/2+H]^+$  of the Zn(II) complex having molecular formula C<sub>66</sub>H<sub>74</sub>N<sub>6</sub>O<sub>6</sub>Zn is calculated as 1110.4961 and 556.2560, accordingly. In the ESI-MS spectrum, the molecular ion peak at  $m/z$  556.0274 was attributed to the  $[M/2+H]^+$  mass value, which is matching with the theoretical mass and hence confirms the product **L<sub>2</sub>-Zn**. The FT-IR spectrum of **L<sub>2</sub>-Zn** is displayed in Figure S19. The stretching frequencies of the terpyridyl  $\nu(C=N)$  in the complex **L<sub>2</sub>-Zn** are visible at 1596 cm<sup>-1</sup> in the spectrum. Likewise, the ester  $\nu(C=O)$  and  $\nu(OCH_3)$  stretching is observed at 1735 cm<sup>-1</sup> and 2914 cm<sup>-1</sup>, accordingly. The frequency at 1469 cm<sup>-1</sup> depicts the aromatic rings  $\nu(C-C)$  stretching. Additionally, the ether  $\nu(C-O)$  in the terpyridine ring exhibited the stretching frequency at 1392 cm<sup>-1</sup>. Moreover, the infrared frequency at 586 cm<sup>-1</sup> attributed to  $\nu(Zn-N)$ .

**Table S1.** Comparison of L<sub>2</sub> with previously reported fluorescent probes for the selective detection of Zn<sup>2+</sup> ions.

| Probe Structure                                                                     | Target    | $\lambda_{em}$ (nm) | Limit of Detection     | RGB Integration | Application                                  | Reference No. in Manuscript |
|-------------------------------------------------------------------------------------|-----------|---------------------|------------------------|-----------------|----------------------------------------------|-----------------------------|
| 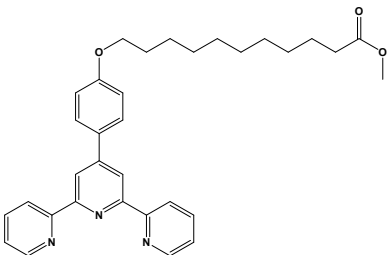    | Zn        | 480                 | 84 nM                  | Yes             | Test paper strip, Live cell imaging          | Current Work                |
|     | Zn and Al | 512                 | 1.02 nM                | NO              | Live cell imaging – Human colon cancer cells | 37a                         |
|   | Zn        | 550                 | --                     | NO              | Live-cell imaging of HeLa cells              | 37b                         |
|  | Zn        | 498                 | $1.1 \times 10^{-7}$ M | NO              | Test paper strip                             | 37c                         |
|   | Zn        | 536                 | 4.48 $\mu$ M           | NO              | Detection in pure water                      | 37f                         |



|                                                                                  |    |     |                           |    |                                |     |
|----------------------------------------------------------------------------------|----|-----|---------------------------|----|--------------------------------|-----|
| 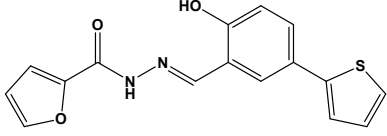 | Zn | 567 | 77 nmol L <sup>-1</sup>   | NO | Detection in aqueous solutions | 37d |
|  | Zn | 498 | 1.73 x 10 <sup>-7</sup> M | NO | --                             | 37e |

**Table S2.** Determination of Zn<sup>2+</sup> in ambient water samples (samples are analyzed in triplicate).

| Sample         | Zn <sup>2+</sup> added (μM) | Zn <sup>2+</sup> found (μM) |                    | Recovery %        |                    |
|----------------|-----------------------------|-----------------------------|--------------------|-------------------|--------------------|
|                |                             | Spectrophotometry           | Solution phase-RGB | Spectrophotometry | Solution phase-RGB |
| Drinking water | 5.00                        | 4.98 ± 0.13                 | 4.91 ± 0.19        | 99.6              | 98.2               |
| Tap water      | 5.00                        | 4.96 ± 0.14                 | 4.89 ± 0.21        | 99.2              | 97.8               |

<sup>a</sup>Conditions: [L<sub>2</sub>] = 10 μM in DMSO: H<sub>2</sub>O (7: 3, v/v) medium

**Table S3.** Theoretically, predicted excited state electronic properties of L<sub>2</sub> and L<sub>2</sub>-Zn<sup>2+</sup> using TD-DFT.

| Code                             | λ <sub>abs</sub> (nm) | Mol. Abs. Coefficient (L m <sup>-1</sup> cm <sup>-1</sup> ) | Oscillator strength (f) | Transition                     | Orbital Contributions                          |
|----------------------------------|-----------------------|-------------------------------------------------------------|-------------------------|--------------------------------|------------------------------------------------|
| L <sub>2</sub>                   | 294                   | 32823                                                       | 0.3608                  | S <sub>0</sub> →S <sub>2</sub> | H→L (17 %),<br>H→L+1 (82 %)                    |
| L <sub>2</sub> -Zn <sup>2+</sup> | 351                   | 12047                                                       | 0.4435                  | S <sub>0</sub> →S <sub>8</sub> | H→L+5 (37 %),<br>H→L+6 (20 %),<br>H→L+7 (33 %) |

\*H - HOMO, L - LUMO orbitals
